# Supplementary material
Source: Springer Nature journal article supplement (https://www.springermedizin.de/resource/supplementary/13033_2012_126_MOESM2_ESM.pdf/9651902)
Supplement: MOESM2 [file 9651902]

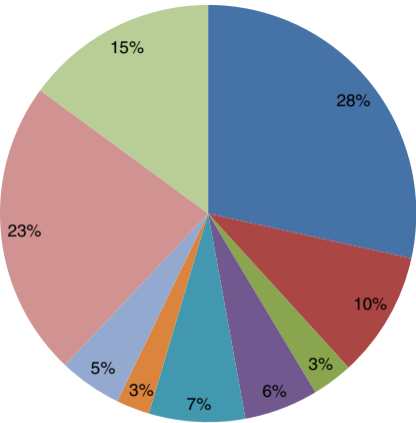

■ No clinical problem (n=99)

■ Remain in Stress Only Type (n=34)

■ Remain in Self-harm Type (n=11)

■ Remain in Psychosis Type (n=20)

■ Remain in Depression Type (n=26)

■ Remain in Single Other Symptom Type (n=9)

■ Remain in Miscellaneous Type (n=17)

■ Change from Clinical Problems to No clinical problem (n=80)

■ Change between Different Clinical Problems (n=52)

Total N = 348; Missing = 15
